# Supplementary material
Source: PubMed Central journal article supplement (PMC3177148)
Supplement: NIHMS325048-supplement-Supp_Table_S1___fig_S1-S2.pdf [file NIHMS325048-supplement-Supp_Table_S1___fig_S1-S2.pdf]

## Supplemental data

### **The periplasmic membrane proximal domain of MacA acts as a switch in stimulation of ATP hydrolysis by MacB transporter**

**Sita D. Modali and Helen I. Zgurskaya\***

Department of Chemistry and Biochemistry

University of Oklahoma

101 Stephenson Parkway

Norman, OK 73019

\* Corresponding author: Helen I. Zgurskaya, Department of Chemistry and Biochemistry,  
University of Oklahoma, 101 Stephenson Parkway, Norman, OK 73019. Phone: (405) 325-1678.  
Fax: (405) 325-6111. E.mail: [elenaz@ou.edu](mailto:elenaz@ou.edu)

**Table S1. Peptide masses of whole-length MacA<sup>WT</sup> and MacA<sup>G353A</sup> and their major tryptic fragments**

| Peptide                                  | Mass of MacA and its peptides (Da) based |             |
|------------------------------------------|------------------------------------------|-------------|
|                                          | on:                                      |             |
|                                          | MALDI-TOF                                | AA sequence |
| <b>MacA<sup>WT</sup> whole length</b>    | 41,155                                   | 41,443      |
| M1-K139                                  | 15,338                                   | 15,511      |
| A140-Q371 + 6His                         | 26,094                                   | 25,950      |
| <b>MacA<sup>G353A</sup> whole length</b> | 41,500                                   | 41,457      |
| M1-R334                                  | 36,666                                   | 36,804      |
| M1-K326                                  | 36,022                                   | 35,862      |
| M1-K324                                  | 35,883                                   | 35,634      |
| A140-Q371 + 6His                         | 26,096                                   | 25,950      |
| A140-R334                                | 20,455                                   | 20,141      |

Figure S1 Modali and Zgurskaya

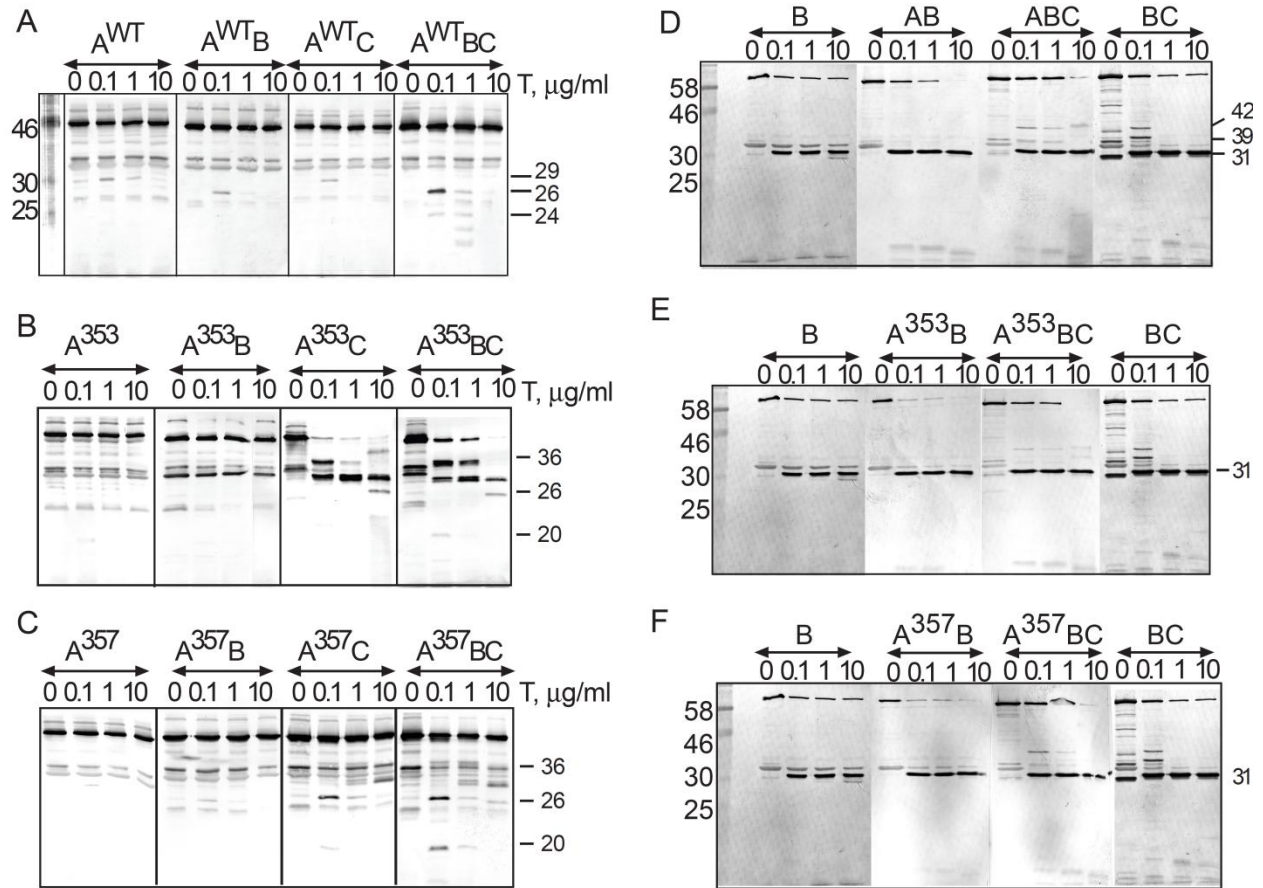

**Figure S1. *In vivo* tryptic digest of MacA and MacB produced in cells with different genetic backgrounds. A, B, C.** *E. coli* W4680AD ( $\Delta$ *acrAB*,  $\Delta$ *acrD*) and ECM2115 (MC4100  $\Delta$ *acrAB*  $\Delta$ *tolC*) cells carrying plasmids producing MacA variants alone ( $A^{WT}$ ,  $A^{353}$ ,  $A^{357}$ ) or in the presence of MacB ( $A^{WT}B$ ,  $A^{353}B$ ,  $A^{357}B$ ) were treated with trypsin at indicated concentrations and analyzed by anti-MacA immunoblotting. **D.** *E. coli* W4680AD ( $\Delta$ *acrAB*,  $\Delta$ *acrD*) and ECM2115 (MC4100  $\Delta$ *acrAB*  $\Delta$ *tolC*) cells carrying plasmids producing MacB alone or in the presence of MacA<sup>wt</sup> were treated with trypsin at indicated concentrations and analyzed by anti-MacB immunoblotting. **E, F.** The same as **D** but MacB was co-expressed with MacA<sup>G353A</sup> and MacA<sup>G357A</sup> variants ( $A^{353}B$ ,  $A^{357}B$ ). The composition of complexes is shown above the patterns with TolC indicated by "C" when present in cells.

Figure S2 Modali and Zgurskaya

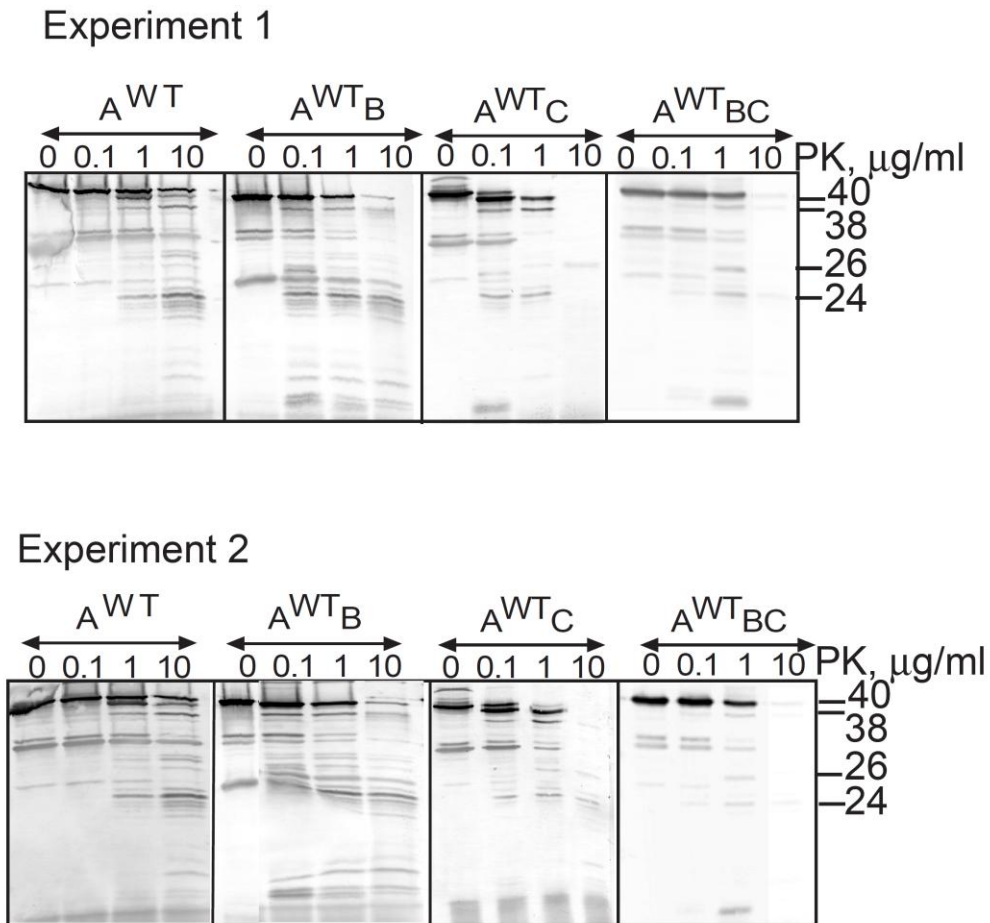

**Figure S2. Differences in proteolytic patterns of MacA are highly reproducible.** The *in vivo* proteolytic profiles of  $\text{MacA}^{WT}$  generated by treatment with PK are shown (see Fig. 3 for details). The composition of complexes is shown above the patterns with MacB and TolC indicated by “B” and “C” when present in cells. Two independent experiments are shown.
